# Supplementary material for: Catalytic performance of tridentate versus bidentate Co(ii) complexes supported by Schiff base ligands in vinyl addition polymerization of norbornene
Source: Royal Society of Chemistry journal article supplement (doi:10.1039/d2ra07241f), 2022-01-01
Supplement: d2ra07241f1.pdf [file d2ra07241f1.pdf]

# Catalytic Performance of Tridentate Versus Bidentate Co(II) Complexes Supported by Schiff Base Ligands in Vinyl Addition Polymerization of Norbornene

*Kyeonghun Kim,<sup>1†</sup> Saira Nayab,<sup>1,2†</sup> Yerim Cho,<sup>1</sup> Hyewon Jung,<sup>4</sup> Hyeonuk Yeo,<sup>3</sup> Hyosun Lee,<sup>1\*</sup>  
and Sang-Ho Lee<sup>4\*</sup>*

<sup>1</sup>Department of Chemistry and Green-Nano Materials Research Center, Kyungpook National University, Daegu, 41566, Republic of Korea

<sup>2</sup>Department of Chemistry, Shaheed Benazir Bhutto University Sheringal Dir (Upper) 18000, Khyber Pakhtunkhwa, Islamic Republic of Pakistan

<sup>3</sup>Department of Chemistry Education and Department of Pharmacy, Kyungpook National University, Daegu, 41566, Republic of Korea

<sup>4</sup>Center for Advanced Specialty Chemicals, Korea Research Institute of Chemical Technology, Ulsan 44412, Republic of Korea

†These authors contributed equally to this work.

\*Authors for correspondence: (S.-H. L.) [slee@kriict.re.kr](mailto:slee@kriict.re.kr); (H. L.) [hyosunlee@knu.ac.kr](mailto:hyosunlee@knu.ac.kr)



This report was created by ACD/NMR Processor Academic Edition. For more information go to [www.acdlabs.com/nmrprocl](http://www.acdlabs.com/nmrprocl)

2022-06-03 @ 12:32:12

|                        |                                          |               |          |                  |                      |                        |                      |
|------------------------|------------------------------------------|---------------|----------|------------------|----------------------|------------------------|----------------------|
| Acquisition Time (sec) | 3.2768                                   | Comment       | LA       | Date             | 28 Dec 2020 18:57:04 | Date Stamp             | 28 Dec 2020 18:57:04 |
| File Name              | C:\Users\USER-PC\Desktop\KHDAT\MRPN\1111 |               |          | Frequency (MHz)  | 500.15               | Nucleus                | <sup>1</sup> H       |
| Number of Transients   | 16                                       | Origin        | spect    | Owner            | mmf500               | Points Count           | 65536                |
| Pulse Sequence         | zg30                                     | Receiver Gain | 18.00    | SW/Cyclical (Hz) | 10000.00             | Solvent                | CHLOROFORM-d         |
| Spectrum Offset (Hz)   | 3992.6113                                | Spectrum Type | STANDARD | Sweep Width (Hz) | 9999.85              | Temperature (degree C) | 25.100               |

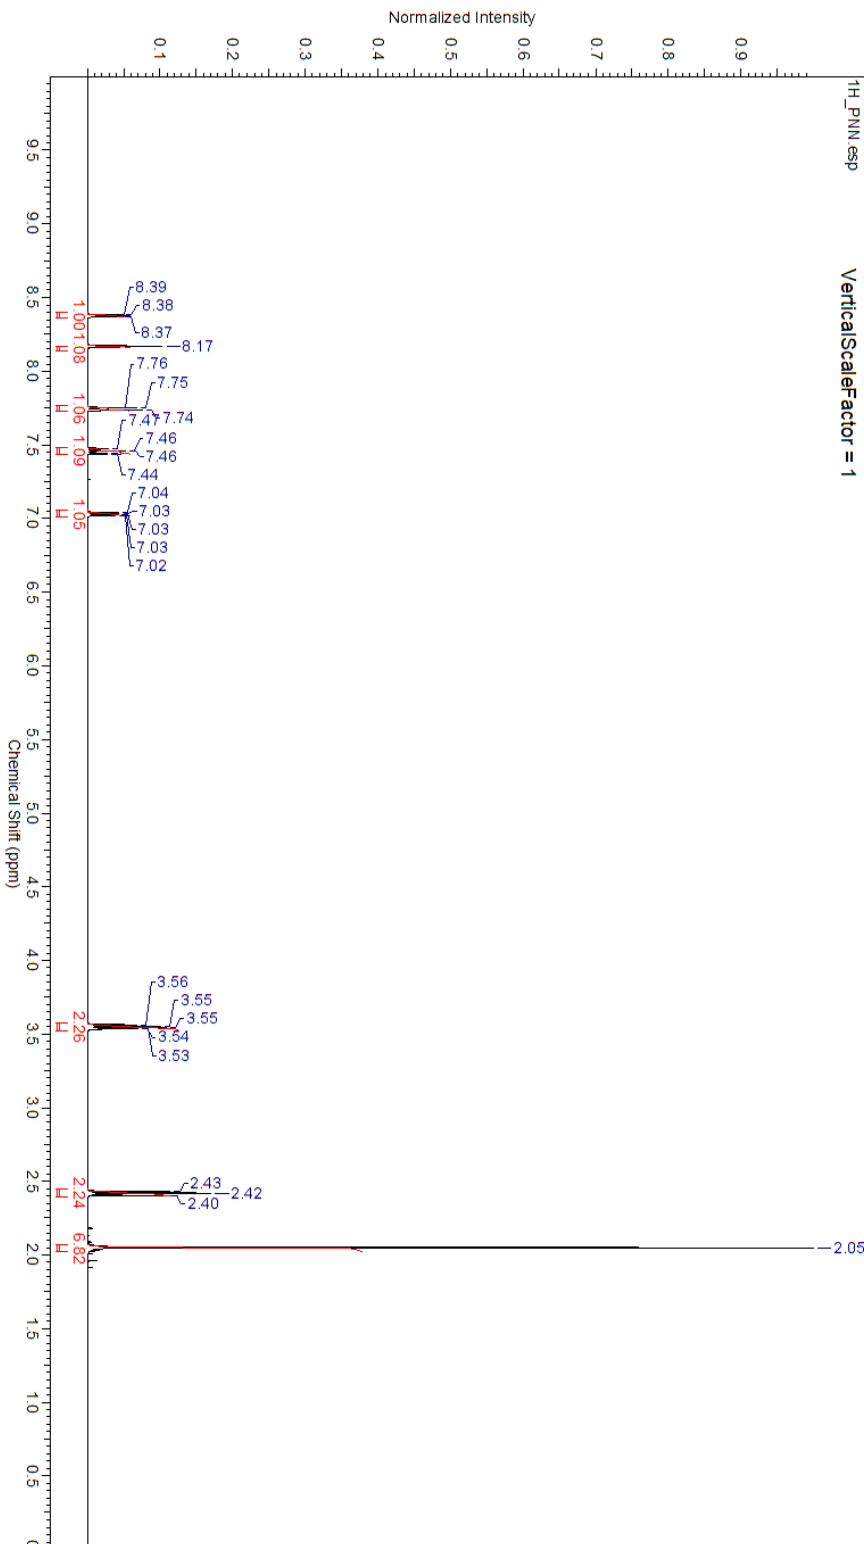

Fig  
dian

|                                           |        |                         |          |                        |                      |                      |                      |
|-------------------------------------------|--------|-------------------------|----------|------------------------|----------------------|----------------------|----------------------|
| (sec)                                     | 1.1010 | Comment                 | PNN      | Date                   | 08 Jun 2022 08:51:28 | Date Stamp           | 08 Jun 2022 08:51:28 |
| C:\Users\USER-PC\Desktop\3C_PNN\PDAT\1\1r |        | Original Points Count   | 32768    | Frequency (MHz)        | 125.76               | Nucleus              | <sup>13</sup> C      |
| spec                                      |        | SW(cyclical) (Hz)       | 29761.90 | Owner                  | nm500                | Points Count         | 32768                |
| 2050.00                                   |        | Sweep Width (Hz)        | 29761.00 | Solvent                | CHLOROFORM-d         | Pulse Sequence       | zgpg30               |
| STANDARD                                  |        |                         |          | Temperature (degree C) | 25.300               | Spectrum Offset (Hz) | 12576.8057           |
| 001_1R_ESP                                |        | VerticalScaleFactor = 1 |          |                        |                      |                      |                      |

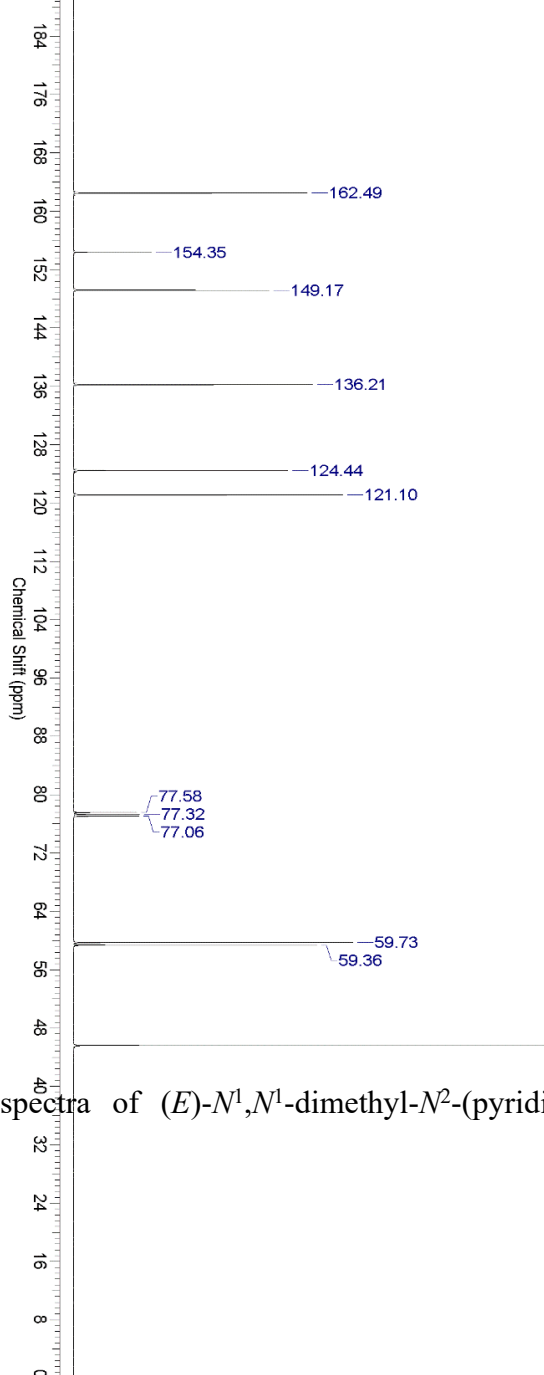

Figure S2. <sup>13</sup>C NMR spectra of (*E*)-*N*<sup>1</sup>,*N*<sup>1</sup>-dimethyl-*N*<sup>2</sup>-(pyridin-2-ylmethyl)ethane-1,2-diamine (*L*<sub>A</sub>).

| Acquisition Time (sec) | 3.2768               | Comment                | QM                                                                    | Date                 | 26 Jan 2021 23:40:48 |
|------------------------|----------------------|------------------------|-----------------------------------------------------------------------|----------------------|----------------------|
| Stamp                  | 26 Jan 2021 23:40:48 | File Name              | C:\Users\USER-PC\Desktop\공신백_CoCo(U) KKH_20211108\NMR\1H_QM\DATA\111r | Number of Transients | 16                   |
| Frequency (MHz)        | 500.15               | Nucleus                | <sup>1</sup> H                                                        | Points Count         | 65636                |
| Final Points Count     | 32768                | Owner                  | nm1500                                                                | Pulse Count          | 2930                 |
| Inver Gain             | 28.50                | SW(spectral) (Hz)      | 10000.00                                                              | Solvent              | CHLOROFORM-d         |
| Spectrum Offset (Hz)   | 3994.1379            | Spectrum Type          | STANDARD                                                              | Sweep Width (Hz)     | 9999.85              |
|                        |                      | Temperature (degree C) | 25.200                                                                |                      |                      |

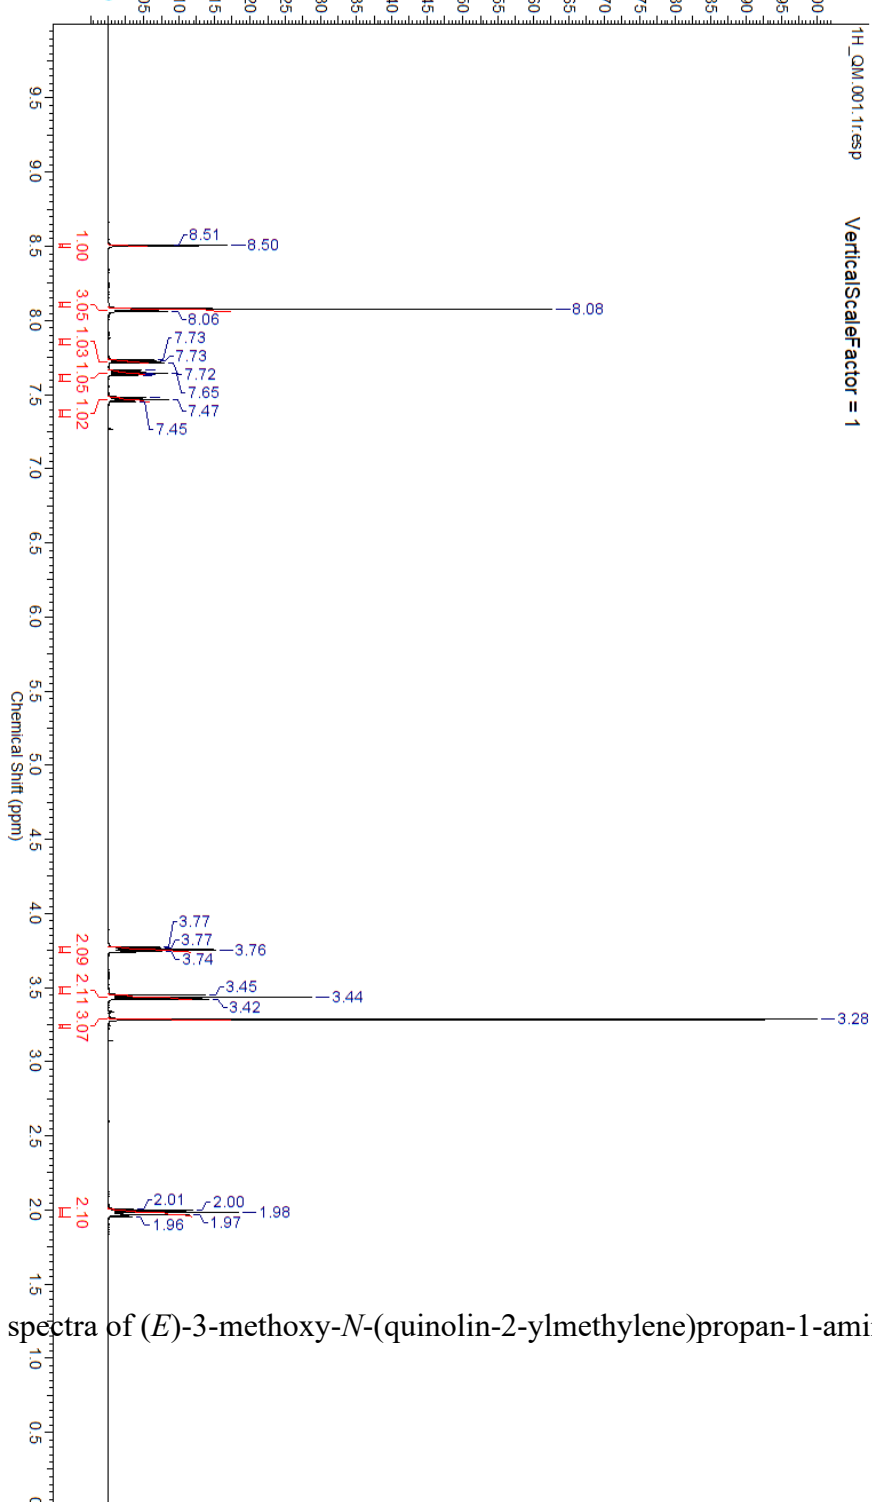

Figure S3. <sup>1</sup>H NMR spectra of (*E*)-3-methoxy-*N*-(quinolin-2-ylmethylene)propan-1-amine (**LB**).

ine (L<sub>B</sub>).

This report was created by ACD/NMR Processor Academic Edition. For more information go to [www.acdlabs.com/nmrprod/](http://www.acdlabs.com/nmrprod/)

2022-06-03 오후 12:32:36

| Acquisition Time (sec) | 1.1010               | Comment       | QM1                                                                          | Date                   | 03 Feb 2021 00:46:56 |
|------------------------|----------------------|---------------|------------------------------------------------------------------------------|------------------------|----------------------|
| Date Stamp             | 03 Feb 2021 00:46:56 | File Name     | C:\User\USER-PC\Desktop\정훈민\실험\ColCo(II)\KH_20211108\NMR\13C_QM1\DATA\11r... |                        |                      |
| Frequency (MHz)        | 125.76               | Nucleus       | 13C                                                                          | Number of Transients   | 2048                 |
| Original Points Count  | 32768                | Owner         | nmr500                                                                       | Points Count           | 32768                |
| Receiver Gain          | 2050.00              | SW/cycle(s)   | 29761.90                                                                     | Pulse Sequence         | zgpg30               |
| Spectrum Offset (Hz)   | 12576.8057           | Spectrum Type | STANDARD                                                                     | Solvent                | CHLOROFORM-d         |
|                        |                      |               |                                                                              | Sweep Width (Hz)       | 29761.00             |
|                        |                      |               |                                                                              | Temperature (degree C) | 25.200               |

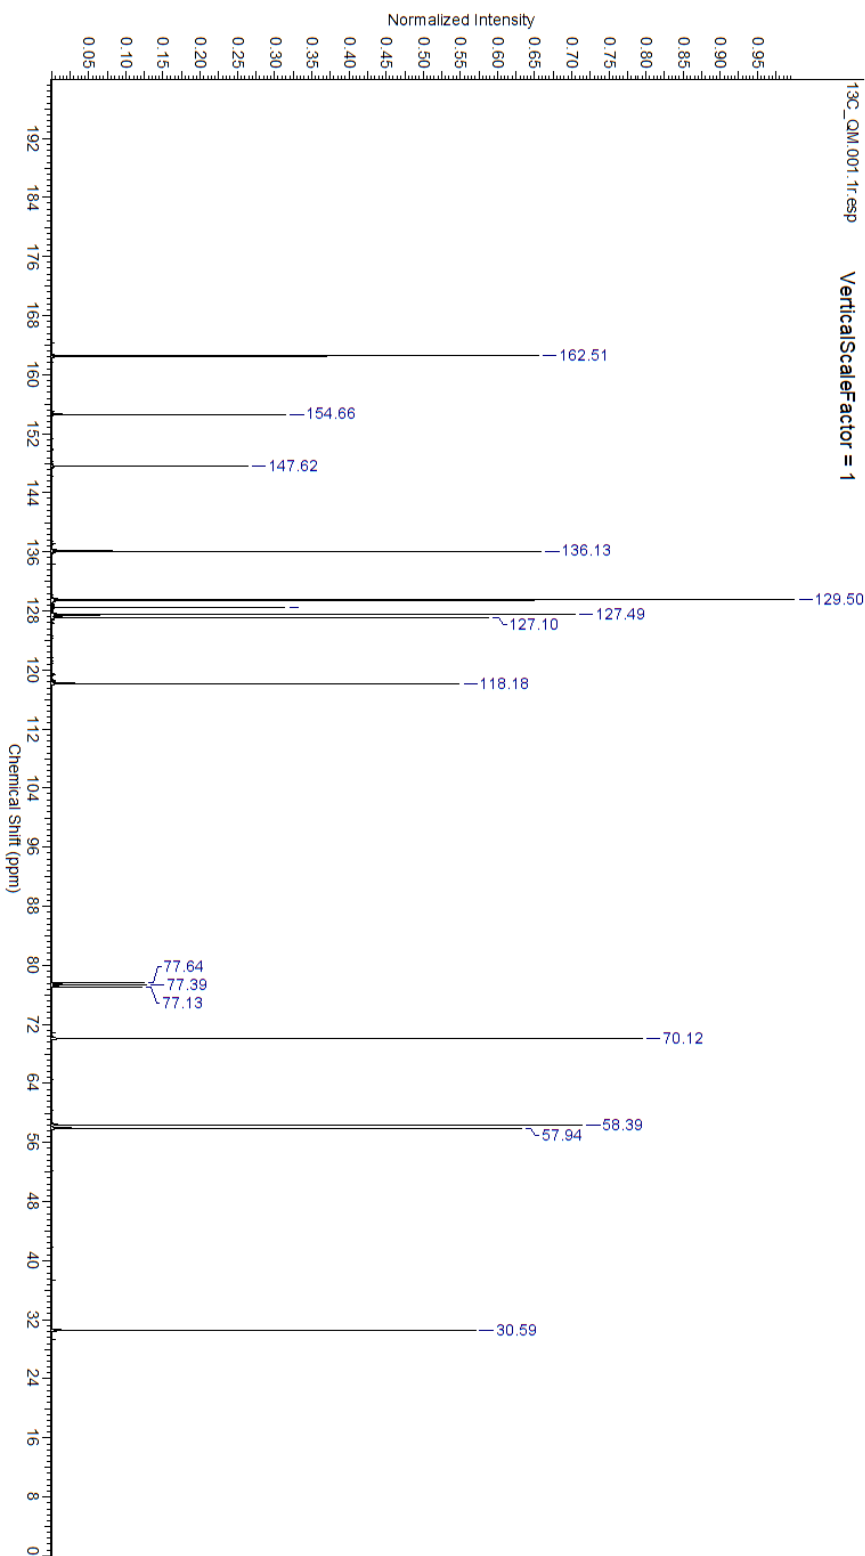

Fig

|                        |                                      |                       |          |                 |                      |                      |                |                      |                      |
|------------------------|--------------------------------------|-----------------------|----------|-----------------|----------------------|----------------------|----------------|----------------------|----------------------|
| Acquisition Time (sec) | 3.2768                               | Comment               | KH-2-6   | Date            | 07 Oct 2020 18:04:00 | Nucleus              | <sup>1</sup> H | Date Samp            | 07 Oct 2020 18:04:00 |
| Name                   | C:\Users\USER-PC\Desktop\APDATA\111r | Original Points Count | 32768    | Frequency (MHz) | 500.15               | Points Count         | 65536          | Number of Transients | 7130                 |
| In                     | spect                                | SW(cyclical) (Hz)     | 10000.00 | Owner           | nmr500               | Pulse Sequence       |                | Pulse Sequence       | zgpg30               |
| Atom Type              | STANDARD                             | Sweep Width (Hz)      | 9999.85  | Solvent         | CHLOROFORM-D         | Spectrum Offset (Hz) | 301.1992       | Spectrum Offset (Hz) | 301.1992             |

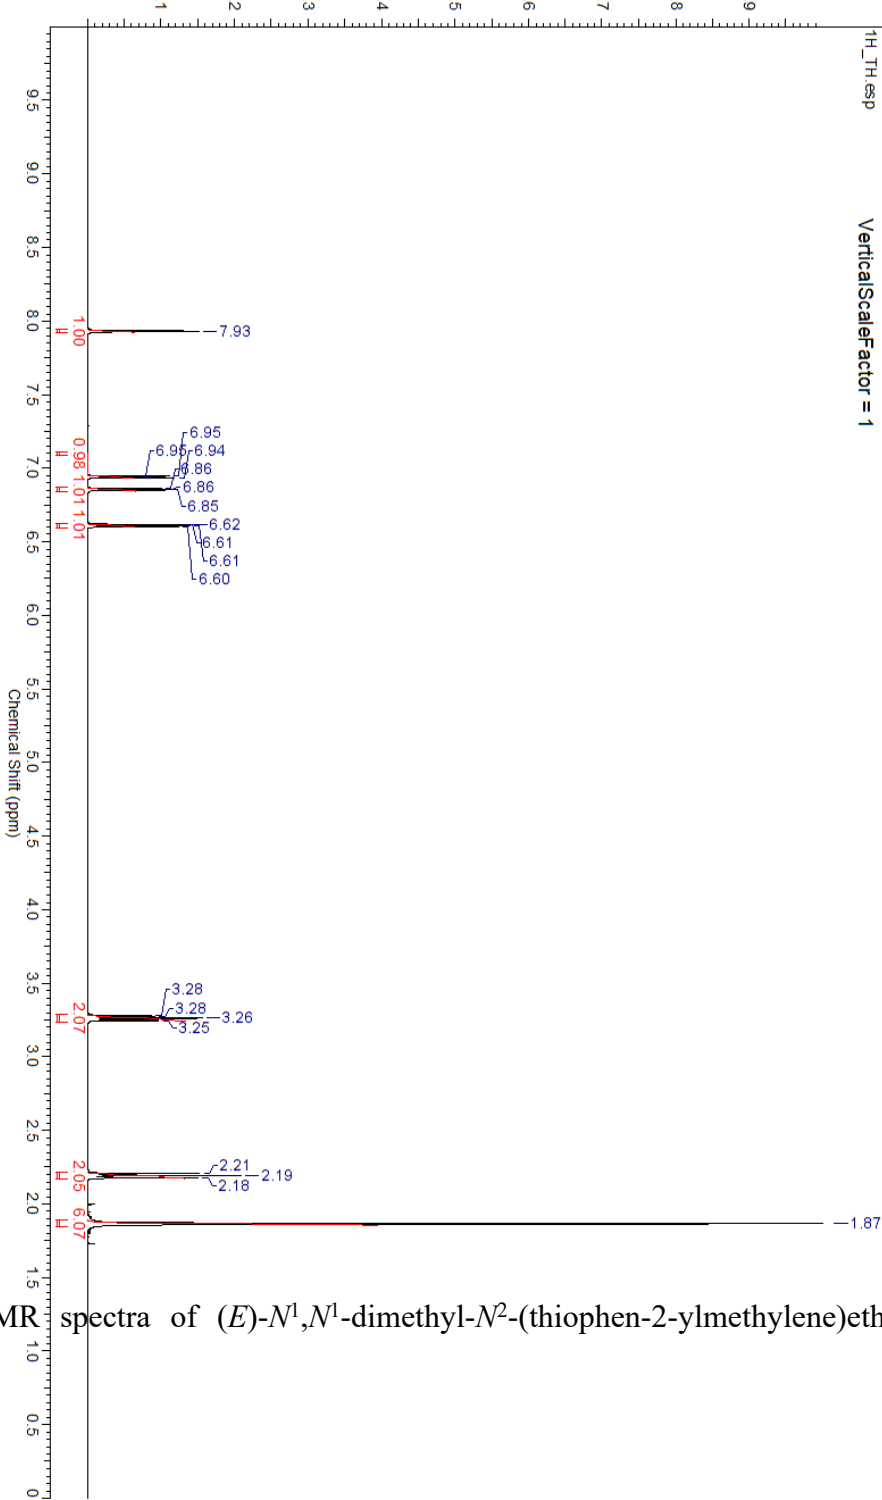

Figure S5. <sup>1</sup>H NMR spectra of (*E*)-*N*<sup>1</sup>,*N*<sup>1</sup>-dimethyl-*N*<sup>2</sup>-(thiophen-2-ylmethylene)ethan-1,2-diamine (*L*<sub>C</sub>).

| Acquisition Time (sec) | 1.1010                                   | Comment                | TH       | Date            | 24 Nov 2021 13:00:48 | Date Stamp           | 24 Nov 2021 13:00:48 |
|------------------------|------------------------------------------|------------------------|----------|-----------------|----------------------|----------------------|----------------------|
| Name                   | C:\Users\USER-PC\Desktop\13C_TH\PDAT\111 | Original Points Count  | 32768    | Frequency (MHz) | 125.76               | Number of Transients | 2048                 |
| Input                  | spect1                                   | Owner                  | nmr500   | Nucleus         | <sup>13</sup> C      | Pulse Sequence       | zgpg30               |
| Owner Gain             | 2050.00                                  | SM (cyclical) (Hz)     | 29761.90 | Points Count    | 32768                | Spectrum Offset (Hz) | 12576.8057           |
| Spectrum Type          | STANDARD                                 | Sweep Width (Hz)       | 29761.00 | Solvent         | CHLOROFORM-d         |                      |                      |
|                        |                                          | Temperature (degree C) | 27.800   |                 |                      |                      |                      |

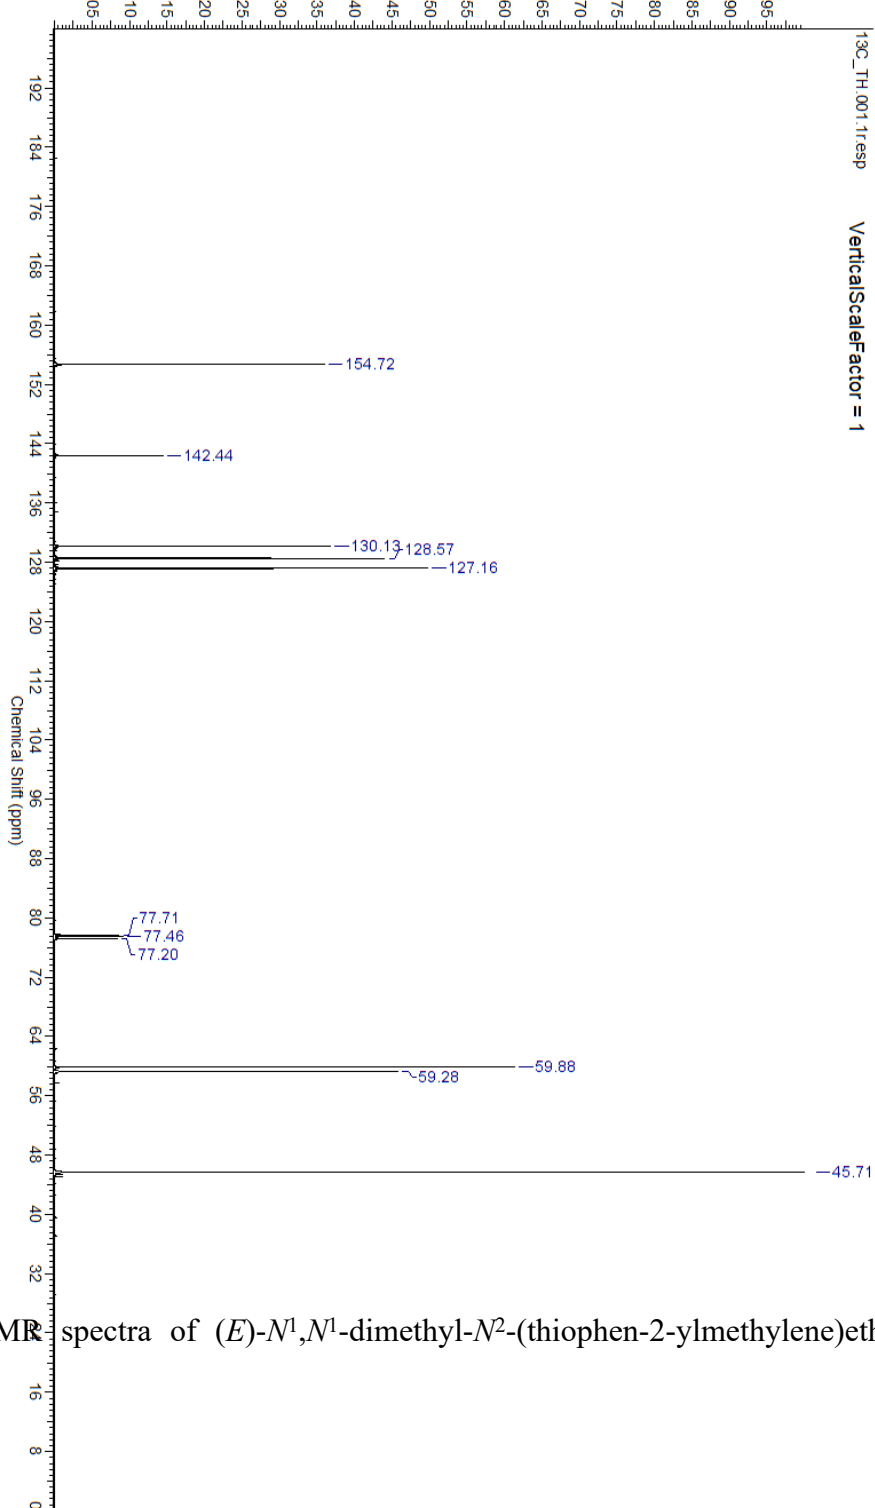

**Figure S6.** <sup>13</sup>C NMR spectra of (*E*)-*N*<sup>1</sup>,*N*<sup>1</sup>-dimethyl-*N*<sup>2</sup>-(thiophen-2-ylmethylene)ethane-1,2-diamine (*L*<sub>C</sub>).



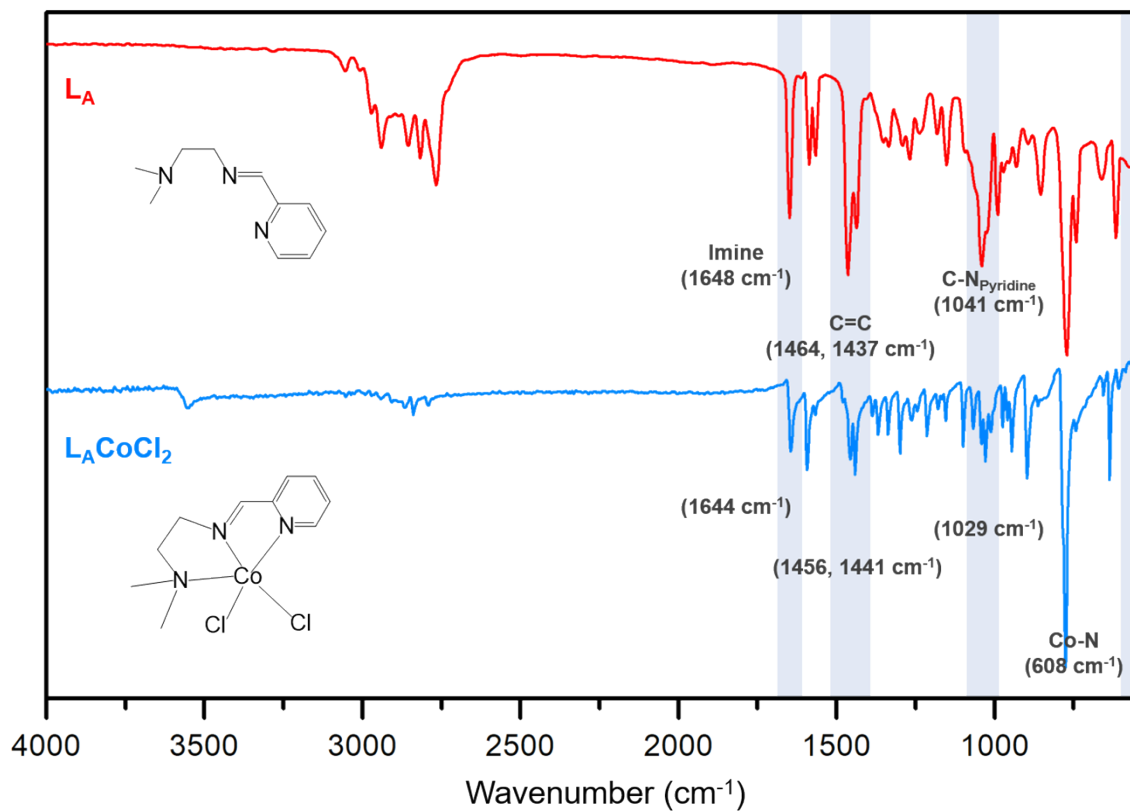

**Figure S7.** FT-IR spectrum of  $L_A$  (top) and  $[L_ACoCl_2]$  (bottom).

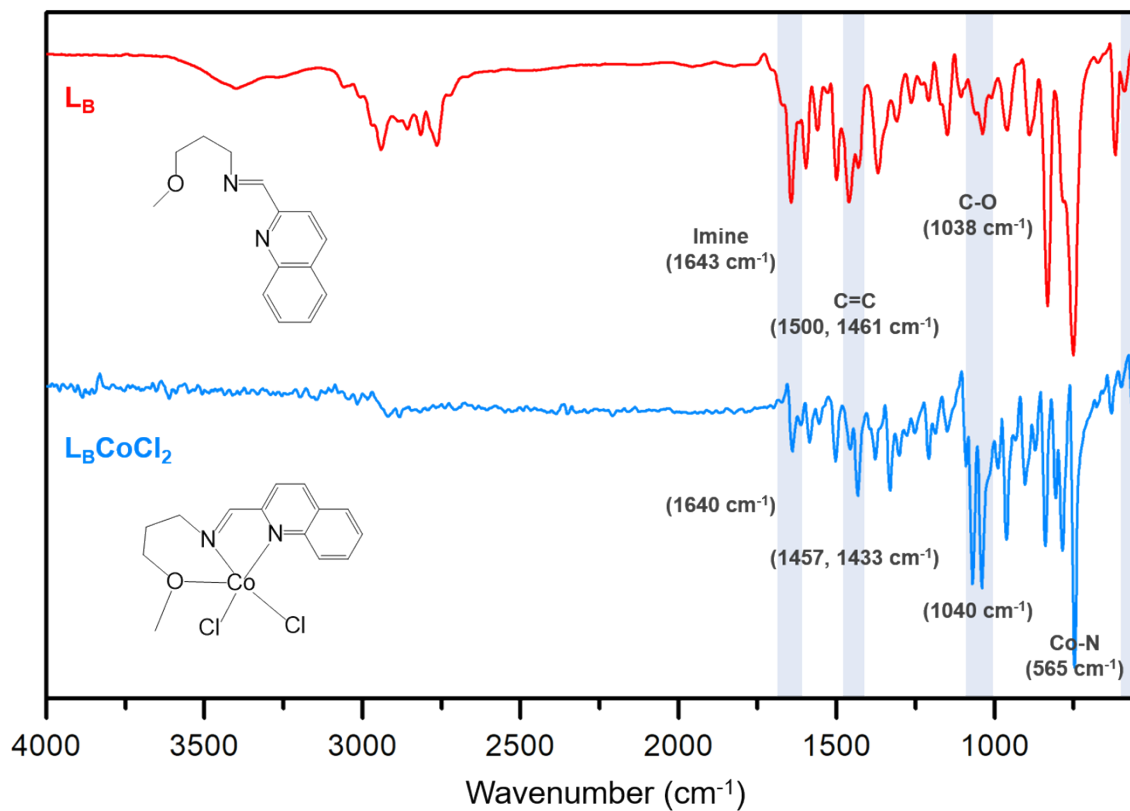

**Figure S8.** FT-IR spectrum of **L<sub>B</sub>** (top) and **[L<sub>B</sub>CoCl<sub>2</sub>]** (bottom).

(A)  $[\text{L}_\text{B}\text{CoCl}_2]$

(B)  $[\text{L}_\text{C}\text{CoCl}_2]$

**Figure S9.** Elemental analysis of the synthesized (A)  $[\text{L}_\text{B}\text{CoCl}_2]$  and (B)  $[\text{L}_\text{C}\text{CoCl}_2]$ .

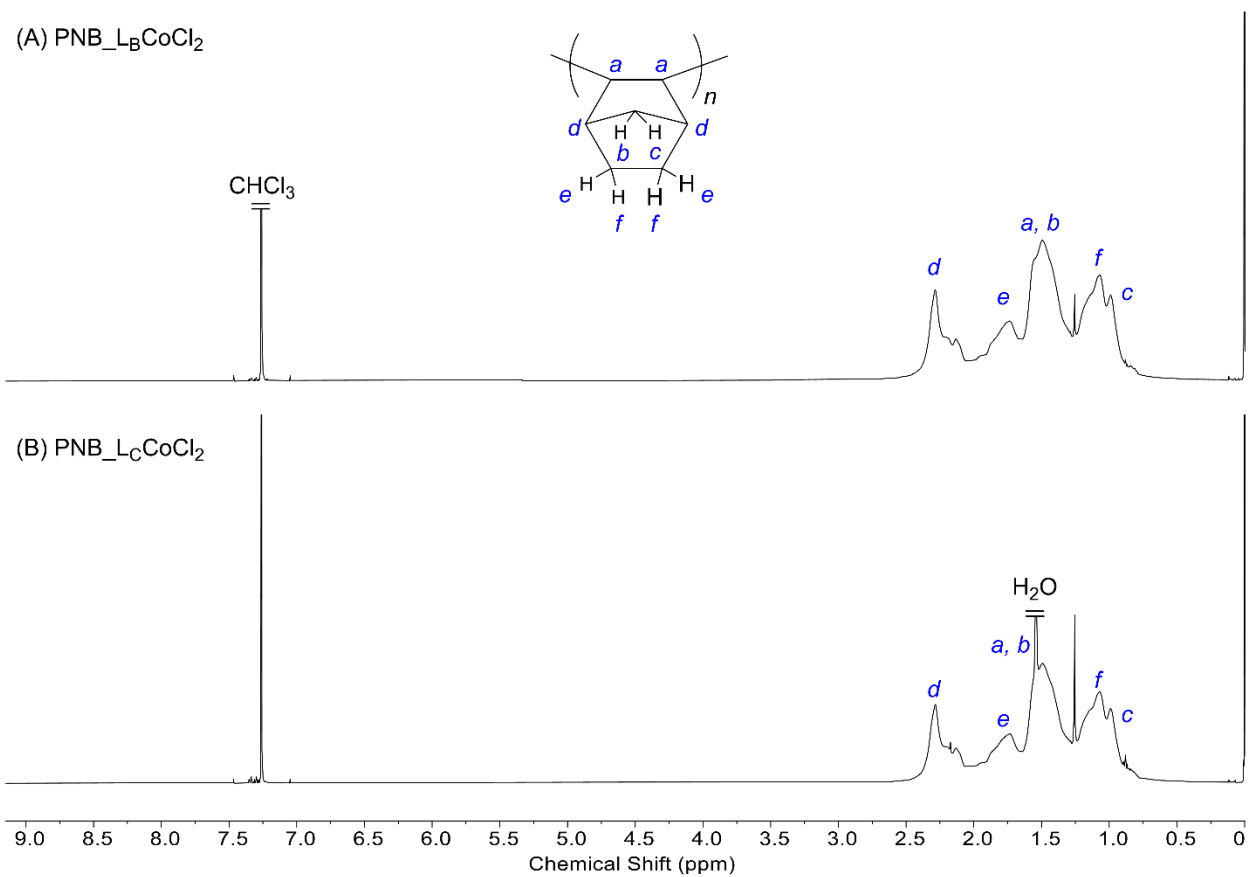

**Figure S10.** <sup>1</sup>H NMR spectra of polynorbornenes (PNBs) using (A) [L<sub>B</sub>CoCl<sub>2</sub>] and (B) [L<sub>C</sub>CoCl<sub>2</sub>] in CDCl<sub>3</sub>.

(A) PNB\_L<sub>B</sub>CoCl<sub>2</sub>

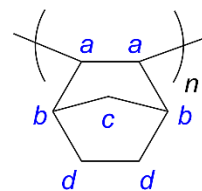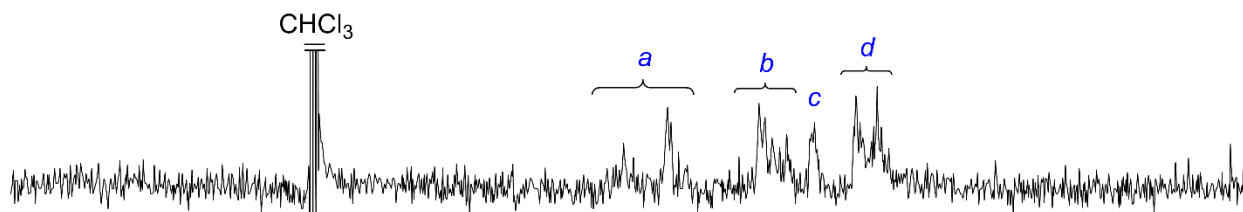

(B) PNB\_L<sub>C</sub>CoCl<sub>2</sub>

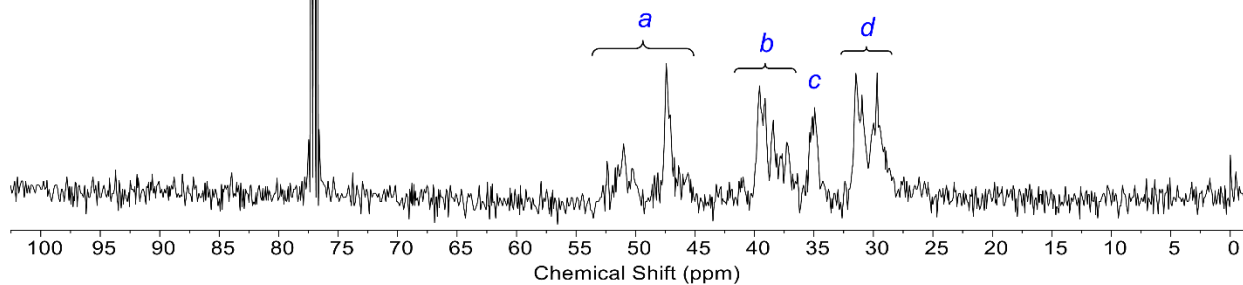

**Figure S11.** <sup>13</sup>C NMR spectra of polynorbornenes (PNBs) using (A) [L<sub>B</sub>CoCl<sub>2</sub>] and (B) [L<sub>C</sub>CoCl<sub>2</sub>] in CDCl<sub>3</sub>.

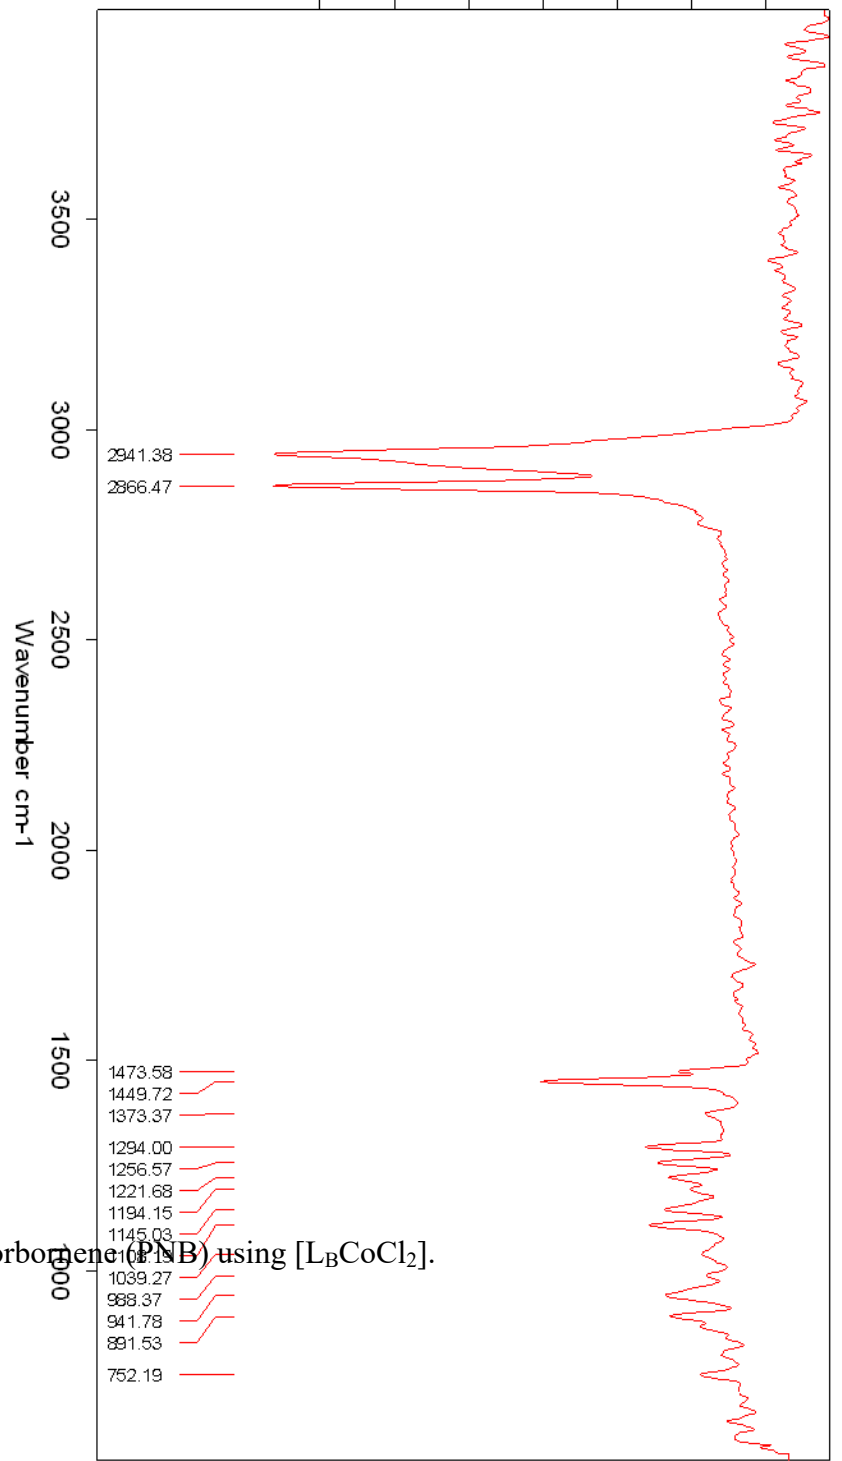

Figure S12. FT-IR spectra of polynorbornene (PNB) using [L<sub>B</sub>CoCl<sub>2</sub>].

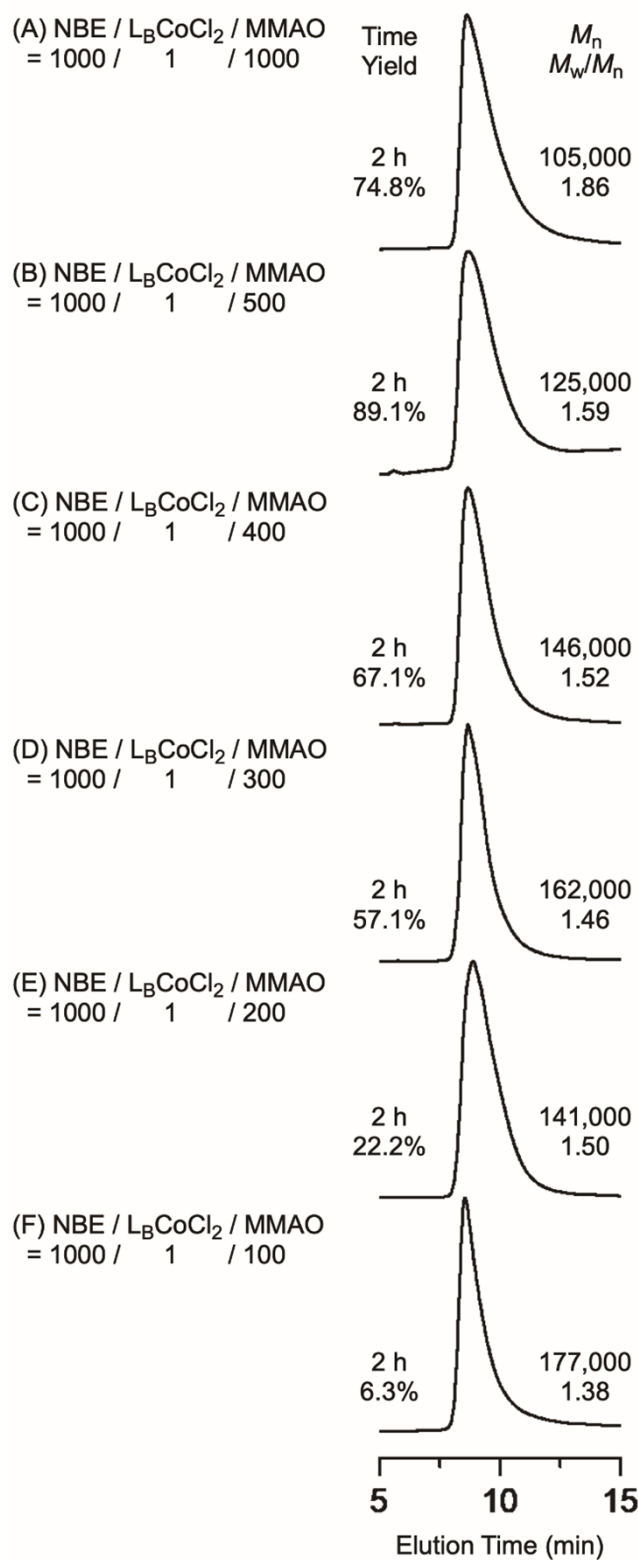

**Figure S13.** Screening of conditions for  $[L_BCoCl_2]$  catalyzed addition polymerization of norbornene depending on amount of MMAO cocatalyst.

**Table S1.** Crystal data and structure refinements of [L<sub>B</sub>CoCl<sub>2</sub>] and [L<sub>C</sub>CoCl<sub>2</sub>].

|                                                   | [L <sub>B</sub> CoCl <sub>2</sub> ]                                | [L <sub>C</sub> CoCl <sub>2</sub> ]                               |
|---------------------------------------------------|--------------------------------------------------------------------|-------------------------------------------------------------------|
| Empirical formula                                 | C <sub>14</sub> H <sub>16</sub> Cl <sub>2</sub> CoN <sub>2</sub> O | C <sub>9</sub> H <sub>14</sub> Cl <sub>2</sub> CoN <sub>2</sub> S |
| Formula weight                                    | 358.12                                                             | 321.11                                                            |
| Temperature (K)                                   | 293(2)                                                             | 220(2)                                                            |
| Wavelength (Å)                                    | 0.650                                                              | 0.630                                                             |
| Crystal system                                    | Monoclinic                                                         | Monoclinic                                                        |
| Space group                                       | P2 <sub>1</sub> /n                                                 | P2 <sub>1</sub> /c                                                |
| a (Å)                                             | 8.3140(17)                                                         | 9.7710(19)                                                        |
| b (Å)                                             | 11.697(2)                                                          | 11.046(2)                                                         |
| c (Å)                                             | 15.790(3)                                                          | 12.622(3)                                                         |
| α (°)                                             | 90                                                                 | 90                                                                |
| β (°)                                             | 98.79(3)                                                           | 108.05(3)                                                         |
| γ (°)                                             | 90                                                                 | 90                                                                |
| Volume (Å <sup>3</sup> ), Z                       | 1517.5(5), 4                                                       | 1295.3(5), 4                                                      |
| Density (calculated) (Mg m <sup>-3</sup> )        | 1.567                                                              | 1.601                                                             |
| Absorption coefficient (mm <sup>-1</sup> )        | 1.146                                                              | 1.324                                                             |
| F(000)                                            | 732                                                                | 636                                                               |
| Crystal size (mm <sup>3</sup> )                   | 0.08 × 0.05 × 0.02                                                 | 0.03 x 0.03 x 0.02                                                |
| Theta range for data collection (°)               | 2.387 to 29.506                                                    | 1.943 to 33.447                                                   |
| Index ranges                                      | -11 ≤ h ≤ 11, -17 ≤ k ≤ 17, -23 ≤ l ≤ 23                           | -15 ≤ h ≤ 15, -19 ≤ k ≤ 19, -21 ≤ l ≤ 21                          |
| Reflections collected                             | 19291                                                              | 20842                                                             |
| Independent reflections                           | 5283 [R(int) = 0.0453]                                             | 6206 [R(int) = 0.0801]                                            |
| Completeness to theta                             | 97.6 %                                                             | 100.0 %                                                           |
| Refinement method                                 | Full-matrix least-squares on F <sup>2</sup>                        | Full-matrix least-squares on F <sup>2</sup>                       |
| Data / restraints / parameters                    | 5283 / 0 / 182                                                     | 6206 / 0 / 138                                                    |
| Goodness-of-fit on F <sup>2</sup>                 | 0.765                                                              | 10.1213                                                           |
| Final R indices [I > 2σ(I)]                       | R <sub>1</sub> = 0.3990<br>wR <sub>2</sub> = 0.1101                | R <sub>1</sub> = 0.0672<br>wR <sub>2</sub> = 0.2077               |
| R indices (all data)                              | R <sub>1</sub> = 0.0407<br>wR <sub>2</sub> = 0.1121                | R <sub>1</sub> = 0.0898<br>wR <sub>2</sub> = 0.2205               |
| Largest diff. peak and hole (e. Å <sup>-3</sup> ) | 0.775 and -1.208                                                   | 1.788 and -1.762                                                  |



**Table S2.** Selected bond lengths (Å) and angles (°) of [L<sub>B</sub>CoCl<sub>2</sub>] and [L<sub>C</sub>CoCl<sub>2</sub>].

| [L <sub>B</sub> CoCl <sub>2</sub> ] |            | [L <sub>C</sub> CoCl <sub>2</sub> ] |            |
|-------------------------------------|------------|-------------------------------------|------------|
| <b>Bond lengths (Å)</b>             |            |                                     |            |
| Co(1)-N(2)                          | 2.0509(12) | Co(1)-N(1)                          | 2.040(2)   |
| Co(1)-N(1)                          | 2.1827(12) | Co(1)-N(2)                          | 2.078(2)   |
| Co(1)-Cl(2)                         | 2.2767(6)  | Co(1)-Cl(2)                         | 2.2428(9)  |
| Co(1)-Cl(1)                         | 2.333(2)   | Co(1)-Cl(1)                         | 2.2365(10) |
| Co(1)-O(1)                          | 2.212(12)  | N(1)-C(5)                           | 1.278(3)   |
| O(1)-C(13)                          | 1.4406(19) | N(1)-C(6)                           | 1.487(4)   |
| N(2)-C(10)                          | 1.2798(17) | S(1)-C(1)                           | 1.663(4)   |
| <b>Bond angles (°)</b>              |            |                                     |            |
| N(2)-Co(1)-N(1)                     | 107.14(4)  | N(1)-Co(1)-N(2)                     | 85.14(9)   |
| N(2)-Co(1)-O(1)                     | 118.68(3)  | N(1)-Co(1)-Cl(1)                    | 111.57(7)  |
| N(1)-Co(1)-O(1)                     | 124.14(3)  | N(1)-Co(1)-Cl(2)                    | 112.84(8)  |
| N(2)-Co(1)-Cl(1)                    | 101.12(3)  | Cl(1)-Co(1)-Cl(2)                   | 106.76(7)  |
| N(1)-Co(1)-Cl(1)                    | 95.62(3)   | C(5)-N(1)-C(6)                      | 114.7(2)   |
| O(1)-Co(1)-Cl(1)                    | 104.57(2)  | C(5)-N(1)-Co(1)                     | 135.25(19) |
| N(2)-Co(1)-Cl(2)                    | 105.75(9)  | C(6)-N(1)-Co(1)                     | 109.55(16) |
| N(1)-Co(1)-Cl(2)                    | 130.62(8)  | C(1)-S(1)-C(4)                      | 93.03(17)  |
| O(1)-Co(1)-Cl(2)                    | 121.72(8)  | C(2)-C(1)-S(1)                      | 113.9(3)   |
| Cl(1)-Co(1)-Cl(2)                   | 111.11(1)  | C(9)-N(2)-C(7)                      | 109.3(2)   |

**Table S3.** The polymerization of norbornene by  $[\text{L}_\text{B}\text{CoCl}_2]$  in the presence of various  $[\text{Al}]/[\text{Co}]$  ratios.

| Entry | Catalyst <sup>a</sup>              | Ratio <sup>b</sup> | Yield. <sup>c</sup><br>(%) | Activity <sup>d</sup><br>(g/mol Cat·h)×10 <sup>4</sup> | $M_n^e$ (g/mol)<br>×10 <sup>5</sup> (GPC) | PDI  |
|-------|------------------------------------|--------------------|----------------------------|--------------------------------------------------------|-------------------------------------------|------|
| 1     | $[\text{L}_\text{B}\text{CoCl}_2]$ | 1:100:1000         | 6.3                        | 0.30                                                   | 1.77                                      | 1.38 |
| 2     | $[\text{L}_\text{B}\text{CoCl}_2]$ | 1:200:1000         | 52.2                       | 2.70                                                   | 1.41                                      | 1.50 |
| 3     | $[\text{L}_\text{B}\text{CoCl}_2]$ | 1:300:1000         | 57.1                       | 2.96                                                   | 1.62                                      | 1.46 |
| 4     | $[\text{L}_\text{B}\text{CoCl}_2]$ | 1:400:1000         | 67.1                       | 3.48                                                   | 1.46                                      | 1.52 |
| 5     | $[\text{L}_\text{B}\text{CoCl}_2]$ | 1:500:1000         | 89.1                       | 4.22                                                   | 1.25                                      | 1.59 |
| 6     | $[\text{L}_\text{B}\text{CoCl}_2]$ | 1:1000:1000        | 74.8                       | 3.54                                                   | 1.05                                      | 1.86 |

<sup>a</sup> $[\text{Co(II) catalyst}]_0 = 15 \mu\text{mol}$ ,  $[\text{norbornene}]_0/[\text{MMAO}]_0 = 65 \text{ mM}$ , polymerization solvent, 20 mL of chlorobenzene; polymerization temperature = 25 °C; polymerization time = 2 h. <sup>b</sup>Yield is defined as a mass of dried polymer recovered/mass of monomer used. <sup>c</sup>Activity is calculated as (gPNB mol cat<sup>-1</sup> h<sup>-1</sup>). <sup>d</sup> $M_n$  refers to the number average molecular weights of PNB and determined by GPC eluted with chloroform at room temperature, related to PS standard.

**Table S4.** The polymerization of norbornene by [L<sub>C</sub>CoCl<sub>2</sub>] in the presence of MMAO with increasing reaction time.

| Entry <sup>a</sup> | Catalyst <sup>a</sup>               | Time (min) | Yield <sup>b</sup> (%) | Activity <sup>c</sup><br>(g/mol Cat·h)×10 <sup>4</sup> | <i>M</i> <sub>n</sub> <sup>d</sup><br>(g/mol)×10 <sup>5</sup> | PDI  |
|--------------------|-------------------------------------|------------|------------------------|--------------------------------------------------------|---------------------------------------------------------------|------|
| 1                  | [L <sub>C</sub> CoCl <sub>2</sub> ] | 5          | 56.4                   | 64.1                                                   | 1.51                                                          | 1.43 |
| 2                  | [L <sub>C</sub> CoCl <sub>2</sub> ] | 10         | 60.2                   | 34.2                                                   | 1.35                                                          | 1.55 |
| 3                  | [L <sub>C</sub> CoCl <sub>2</sub> ] | 20         | 64.4                   | 18.3                                                   | 1.34                                                          | 1.54 |
| 4                  | [L <sub>C</sub> CoCl <sub>2</sub> ] | 30         | 66.7                   | 12.6                                                   | 1.34                                                          | 1.55 |
| 5                  | [L <sub>C</sub> CoCl <sub>2</sub> ] | 60         | 76.9                   | 7.28                                                   | 0.89                                                          | 1.85 |
| 6                  | [L <sub>C</sub> CoCl <sub>2</sub> ] | 90         | 80.1                   | 5.06                                                   | 1.48                                                          | 1.43 |
| 7                  | [L <sub>C</sub> CoCl <sub>2</sub> ] | 120        | 98.9                   | 4.69                                                   | 2.40                                                          | 1.13 |

<sup>a</sup>[Co(II) catalyst]<sub>0</sub> = 15 μmol, [norbornene]<sub>0</sub>/[MMAO]<sub>0</sub>/[Co(II) catalyst]<sub>0</sub> = 1000:500:1, polymerization solvent, 20 mL of chlorobenzene; polymerisation temperature = 25 °C. <sup>b</sup>Yield is defined as a mass of dried polymer recovered/mass of monomer used. <sup>c</sup>Activity is calculated as (gPNB mol cat<sup>-1</sup> h<sup>-1</sup>). <sup>d</sup>*M*<sub>n</sub> refers to the number average molecular weights of PNB and determined by GPC eluted with chloroform at room temperature, related to PS standard.

**Table S5.** The polymerization of norbornene catalyzed by  $[L_n\text{CoCl}_2]/\text{MMAO}$  ( $L_n = L_A-L_C$ )

| Entry | Catalyst <sup>a</sup> | Solvent        | Temp. (°C) | Yield <sup>b</sup> (%) |
|-------|-----------------------|----------------|------------|------------------------|
| 1     | $[L_A\text{CoCl}_2]$  | chlorobenzene  | 25         | 72.7                   |
| 2     | $[L_A\text{CoCl}_2]$  | dichloroethane | 25         | >10.0                  |
| 3     | $[L_A\text{CoCl}_2]$  | Toluene        | 80         | 69.3                   |
| 4     | $[L_B\text{CoCl}_2]$  | chlorobenzene  | 25         | 89.1                   |
| 5     | $[L_B\text{CoCl}_2]$  | dichloroethane | 25         | 60.1                   |
| 6     | $[L_B\text{CoCl}_2]$  | Toluene        | 80         | 68.0                   |
| 7     | $[L_C\text{CoCl}_2]$  | chlorobenzene  | 25         | 98.9                   |
| 8     | $[L_C\text{CoCl}_2]$  | dichloroethane | 25         | 20.9                   |
| 9     | $[L_C\text{CoCl}_2]$  | Toluene        | 80         | 64.5                   |

system in various solvents.

<sup>a</sup> $[\text{Co(II) catalyst}]_0 = 15 \mu\text{mol}$ ,  $[\text{norbornene}]_0/[\text{MMAO}]_0/[\text{Co(II) catalyst}]_0 = 1000:500:1$ , polymerization solvent, 20 mL of chlorobenzene or dichloroethane or toluene; polymerization time = 2 h. <sup>b</sup>Yield is defined as a mass of dried polymer recovered/mass of monomer used.

<sup>c</sup>Activity is calculated as (gPNB mol cat<sup>-1</sup> h<sup>-1</sup>).
